# Supplementary material
Source: publisher site journal article supplement (https://www.e-cmh.org/upload/media/cmh-2023-0057-Supplementary-Table-5.pdf)
Supplement: Supplementary file 1 [file cmh-2023-0057-Supplementary-Table-5.pdf]

**Supplementary Table 5.** Cox regression analysis of subgroups associated with TTP of (A) entire cohort, (B) SNUH subcohort, and (C) SNUBH subcohort between the CHB and non-CHB groups after IPTW  
(A) Entire cohort

| Variables                | Events/Subjects     |                          | CHB (vs. non-CHB)        |         | P <sup>†</sup> <sub>interaction</sub> |
|--------------------------|---------------------|--------------------------|--------------------------|---------|---------------------------------------|
|                          | CHB group<br>(n=82) | Non-CHB group<br>(n=846) | Adjusted HR*<br>(95% CI) | P-value |                                       |
| Sex                      |                     |                          |                          |         | 0.47                                  |
| Female                   | (n=396)<br>10/29    | 108/367                  | 0.79 (0.40–1.57)         | 0.50    |                                       |
| Male                     | (n=532)<br>6/53     | 145/479                  | 0.23 (0.10–0.51)         | <0.001  |                                       |
| Age                      |                     |                          |                          |         | 0.38                                  |
| ≤60 years                | (n=387)<br>8/48     | 91/339                   | 0.25 (0.12–0.52)         | <0.001  |                                       |
| >60 years                | (n=541)<br>8/34     | 162/507                  | 0.61 (0.31–1.20)         | 0.15    |                                       |
| Ann Arbor classification |                     |                          |                          |         | 0.42                                  |
| Early (I–II)             | (n=392)<br>2/22     | 56/256                   | 0.47 (0.12–1.84)         | 0.28    |                                       |
| Advanced (III–IV)        | (n=536)<br>14/60    | 197/590                  | 0.42 (0.24–0.74)         | 0.003   |                                       |
| LDH                      |                     |                          |                          |         | 0.16                                  |
| Normal (≤225 IU/L)       | (n=500)<br>10/53    | 73/447                   | 0.57 (0.28–1.14)         | 0.11    |                                       |
| Elevated (>225 IU/L)     | (n=428)<br>6/29     | 180/399                  | 0.29 (0.13–0.61)         | 0.001   |                                       |
| Underlying liver status  |                     |                          |                          |         | 0.001                                 |
| No cirrhosis             | (n=872)<br>11/72    | 237/800                  | 0.33 (0.18–0.61)         | <0.001  |                                       |
| Cirrhosis                | (n=56)<br>5/10      | 16/46                    | 1.70 (0.58–4.95)         | 0.33    |                                       |
| IPI risk                 |                     |                          |                          |         | 0.007                                 |
| Low/Low-intermediate     | (n=770)<br>10/65    | 182/705                  | 0.37 (0.19–0.74)         | 0.004   |                                       |
| High/High-intermediate   | (n=158)<br>6/17     | 71/141                   | 0.44 (0.21–0.93)         | 0.03    |                                       |
| Subtype of DLBCL         |                     |                          |                          |         | 0.01                                  |
| GCB                      | (n=340)<br>5/29     | 71/311                   | 0.56 (0.23–1.38)         | 0.21    |                                       |
| Non-GCB                  | (n=537)<br>11/50    | 169/487                  | 0.38 (0.20–0.70)         | <0.001  |                                       |
| BM involvement           |                     |                          |                          |         | 0.01                                  |
| No                       | (n=708)<br>11/59    | 155/649                  | 0.63 (0.34–1.20)         | 0.16    |                                       |
| Yes                      | (n=154)<br>4/19     | 37/135                   | 0.12 (0.05–0.33)         | <0.001  |                                       |
| Extranodal involvement   |                     |                          |                          |         | 0.87                                  |
| No                       | (n=265)<br>4/20     | 59/245                   | 0.99 (0.34–2.87)         | 0.99    |                                       |
| Yes                      | (n=663)<br>12/62    | 194/601                  | 0.34 (0.19–0.59)         | <0.001  |                                       |

**Supplementary Table 5.** Continued  
(B) SNUH subcohort

| Variables                | Events/Subjects  |                       | CHB (vs. non-CHB)     |         | P <sup>†</sup> <sub>interaction</sub> |
|--------------------------|------------------|-----------------------|-----------------------|---------|---------------------------------------|
|                          | CHB group (n=67) | Non-CHB group (n=542) | Adjusted HR* (95% CI) | P-value |                                       |
| Sex                      |                  |                       |                       |         | 0.13                                  |
| Female                   | (n=267)          | 69/242                | 0.94 (0.40–2.23)      | 0.89    |                                       |
| Male                     | (n=342)          | 87/300                | 0.29 (0.12–0.70)      | 0.006   |                                       |
| Age                      |                  |                       |                       |         | 0.35                                  |
| ≤60 years                | (n=285)          | 68/250                | 0.31 (0.11–0.84)      | 0.02    |                                       |
| >60 years                | (n=324)          | 88/292                | 0.81 (0.39–1.72)      | 0.59    |                                       |
| Ann Arbor classification |                  |                       |                       |         | 0.56                                  |
| Early (I–II)             | (n=278)          | 1/22                  | 0.28 (0.06–1.30)      | 0.10    |                                       |
| Advanced (III–IV)        | (n=331)          | 12/45                 | 0.51 (0.27–0.96)      | 0.04    |                                       |
| LDH                      |                  |                       |                       |         | 0.49                                  |
| Normal (≤225 IU/L)       | (n=352)          | 8/47                  | 0.60 (0.26–1.41)      | 0.24    |                                       |
| Elevated (>225 IU/L)     | (n=257)          | 5/20                  | 0.43 (0.17–1.09)      | 0.08    |                                       |
| Underlying liver status  |                  |                       |                       |         | 0.15                                  |
| No cirrhosis             | (n=555)          | 9/58                  | 0.36 (0.18–0.72)      | 0.004   |                                       |
| Cirrhosis                | (n=54)           | 4/9                   | 3.46 (0.11–112.5)     | 0.48    |                                       |
| IPI risk                 |                  |                       |                       |         | 0.98                                  |
| Low/Low-intermediate     | (n=451)          | 7/50                  | 0.58 (0.23–1.47)      | 0.25    |                                       |
| High/High-intermediate   | (n=158)          | 6/17                  | 0.60 (0.27–1.34)      | 0.22    |                                       |
| Subtype of DLBCL         |                  |                       |                       |         | 0.23                                  |
| GCB                      | (n=226)          | 5/21                  | 1.29 (0.40–4.15)      | 0.67    |                                       |
| Non-GCB                  | (n=346)          | 8/43                  | 0.37 (0.18–0.79)      | 0.01    |                                       |
| BM involvement           |                  |                       |                       |         | 0.11                                  |
| No                       | (n=495)          | 9/49                  | 0.70 (0.34–1.46)      | 0.34    |                                       |
| Yes                      | (n=88)           | 4/14                  | 0.22 (0.07–0.75)      | 0.01    |                                       |
| Extranodal involvement   |                  |                       |                       |         | 0.42                                  |
| No                       | (n=189)          | 3/15                  | 1.71 (0.46–6.43)      | 0.99    |                                       |
| Yes                      | (n=420)          | 10/52                 | 0.42 (0.22–0.79)      | 0.01    |                                       |

BM, bone marrow; CHB, chronic hepatitis B; CI, confidence interval; DLBCL, diffuse large B-cell lymphoma; GCB, germinal center B cell; HR, hazard ratio; IPI, International Prognostic Index; IPTW, inverse probability of treatment weighting; LDH, lactate dehydrogenase; SNUH, Seoul National University Hospital; SNUBH, Seoul National University Bundang Hospital.

\*Adjusted for sex, age, Ann Arbor classification, LDH, cirrhosis, extranodal involvement, IPI risk, BM involvement, and classified subtype.

<sup>†</sup>P<sub>interaction</sub> was calculated between the CHB and non-CHB groups.

**Supplementary Table 5.** Continued  
(B) SNUH subcohort

| Variables                | Events/Subjects  |                       | CHB (vs. non-CHB)     |         | P <sup>†</sup> <sub>interaction</sub> |
|--------------------------|------------------|-----------------------|-----------------------|---------|---------------------------------------|
|                          | CHB group (n=15) | Non-CHB group (n=304) | Adjusted HR* (95% CI) | P-value |                                       |
| Sex                      |                  |                       |                       |         | 0.24                                  |
| Female                   | (n=131)          | 41/127                | 0.49 (0.02–10.85)     | 0.65    |                                       |
| Male                     | (n=188)          | 56/177                | 0.26 (0.05–1.41)      | 0.12    |                                       |
| Age                      |                  |                       |                       |         |                                       |
| ≤60 years                | (n=128)          | 33/113                |                       |         |                                       |
| >60 years                | (n=191)          | 64/191                |                       |         | 0.06                                  |
| Ann Arbor classification |                  |                       |                       |         |                                       |
| Early (I–II)             | (n=114)          | 1/3                   | 2.74 (0.75–10.02)     | 0.13    |                                       |
| Advanced (III–IV)        | (n=205)          | 2/12                  | 0.17 (0.04–0.76)      | 0.02    |                                       |
| LDH                      |                  |                       |                       |         | 0.03                                  |
| Normal (≤225 IU/L)       | (n=148)          | 2/6                   | 7.37 (0.93–58.47)     | 0.06    |                                       |
| Elevated (>225 IU/L)     | (n=171)          | 1/9                   | 0.07 (0.01–0.31)      | <0.001  |                                       |
| Underlying liver status  |                  |                       |                       |         |                                       |
| No cirrhosis             | (n=317)          | 2/14                  |                       |         |                                       |
| Cirrhosis                | (n=2)            | 1/1                   |                       |         |                                       |
| IPI risk                 |                  |                       |                       |         |                                       |
| Low/Low-intermediate     | (n=316)          | 3/15                  |                       |         |                                       |
| High/High-intermediate   | (n=3)            | 0/0                   |                       |         |                                       |
| Subtype of DLBCL         |                  |                       |                       |         |                                       |
| GCB                      | (n=114)          | 0/8                   |                       |         |                                       |
| Non-GCB                  | (n=191)          | 3/7                   |                       |         |                                       |
| BM involvement           |                  |                       |                       |         |                                       |
| No                       | (n=213)          | 2/10                  |                       |         |                                       |
| Yes                      | (n=66)           | 1/5                   |                       |         |                                       |
| Extranodal involvement   |                  |                       |                       |         | 0.96                                  |
| No                       | (n=76)           | 1/5                   | 0.21 (0.04–1.13)      | 0.07    |                                       |
| Yes                      | (n=243)          | 2/10                  | 0.21 (0.02–2.00)      | 0.17    |                                       |

BM, bone marrow; CHB, chronic hepatitis B; CI, confidence interval; DLBCL, diffuse large B-cell lymphoma; GCB, germinal center B cell; HR, hazard ratio; IPI, International Prognostic Index; IPTW, inverse probability of treatment weighting; LDH, lactate dehydrogenase; SNUH, Seoul National University Hospital; SNUBH, Seoul National University Bundang Hospital.

\*Adjusted for sex, age, Ann Arbor classification, LDH, cirrhosis, extranodal involvement, IPI risk, BM involvement, and classified subtype.  
<sup>†</sup>P<sub>interaction</sub> was calculated between the CHB and non-CHB groups.

<sup>†</sup>In cases where patients could not be allocated to subgroups, making multivariable analysis and P for interaction statistically incomputable, the corresponding cells were left blank.
